# Supplementary figures and images for: Spatial coding defects of hippocampal neural ensemble calcium activities in the triple-transgenic Alzheimer’s disease mouse model
Source: PubMed Central journal article supplement — Neurobiol Dis. Author manuscript; Available in PMC 2022 Sep 17. (PMC9482454; doi:10.1016/j.nbd.2021.105562), 2021-11-24

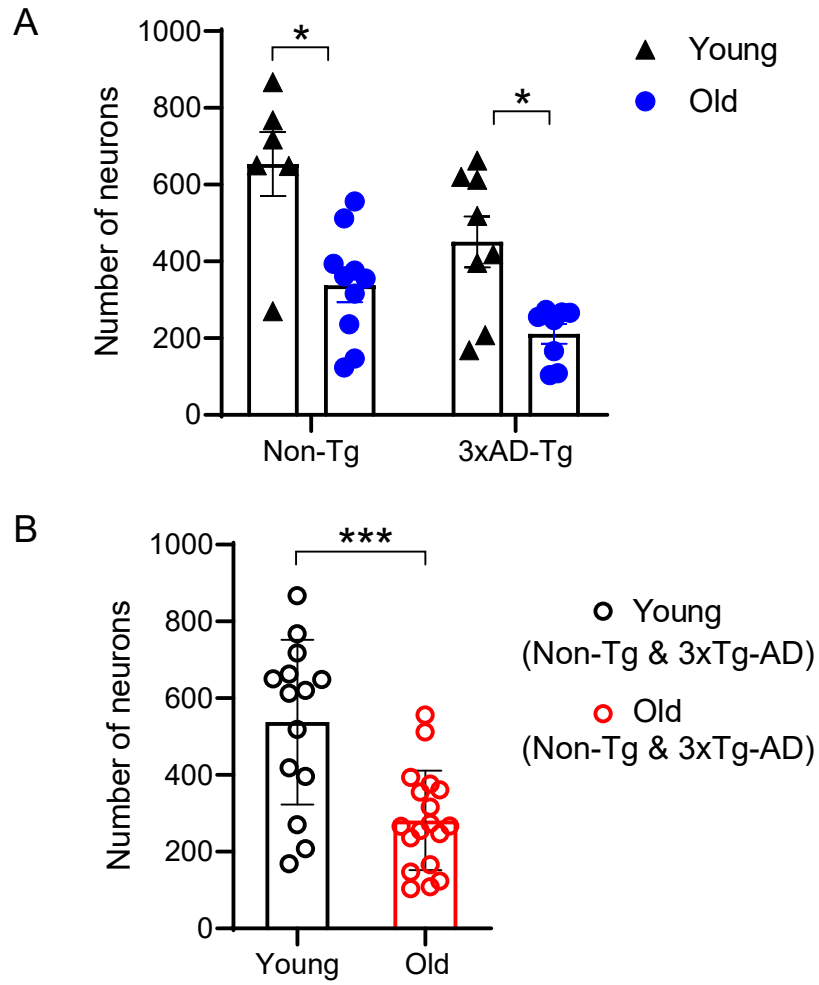

Fig. S1

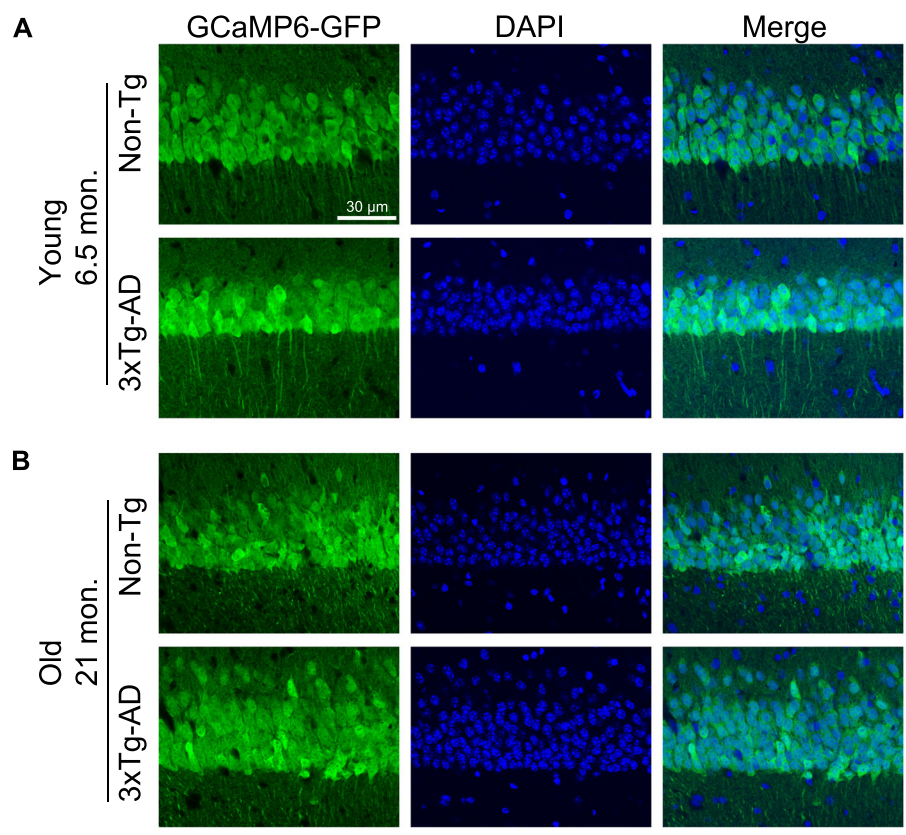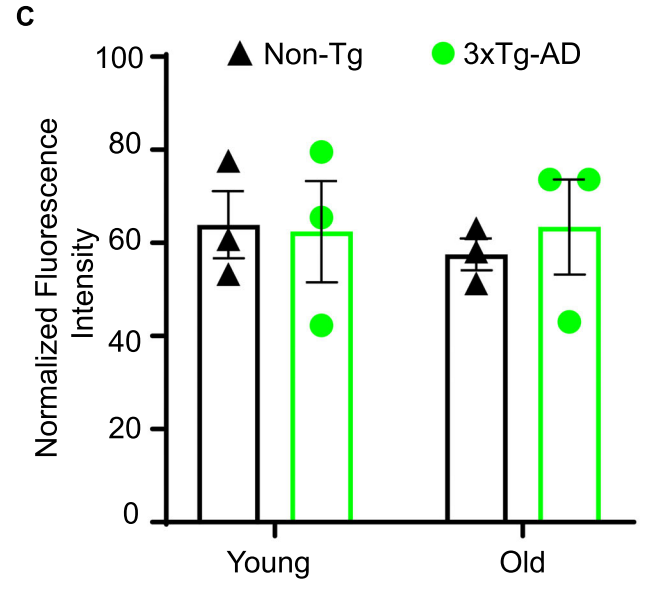

Fig. S2

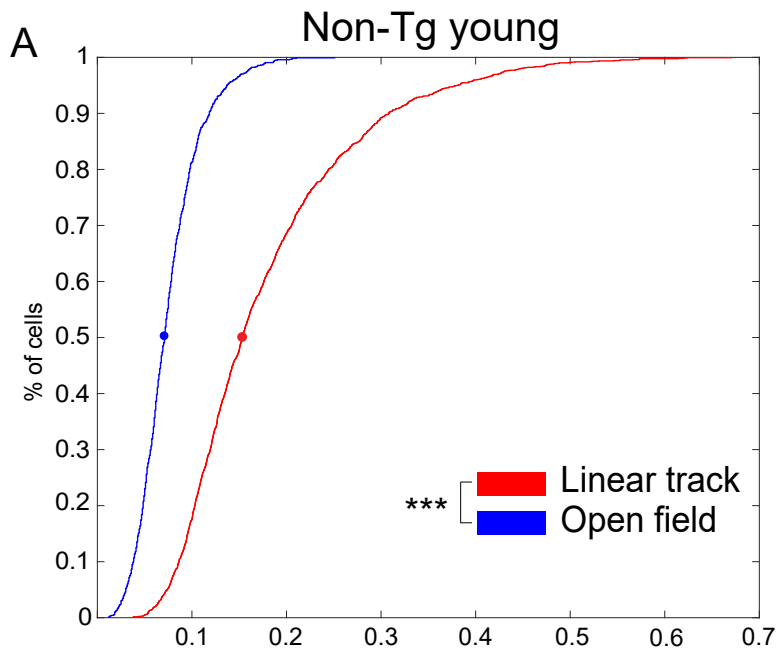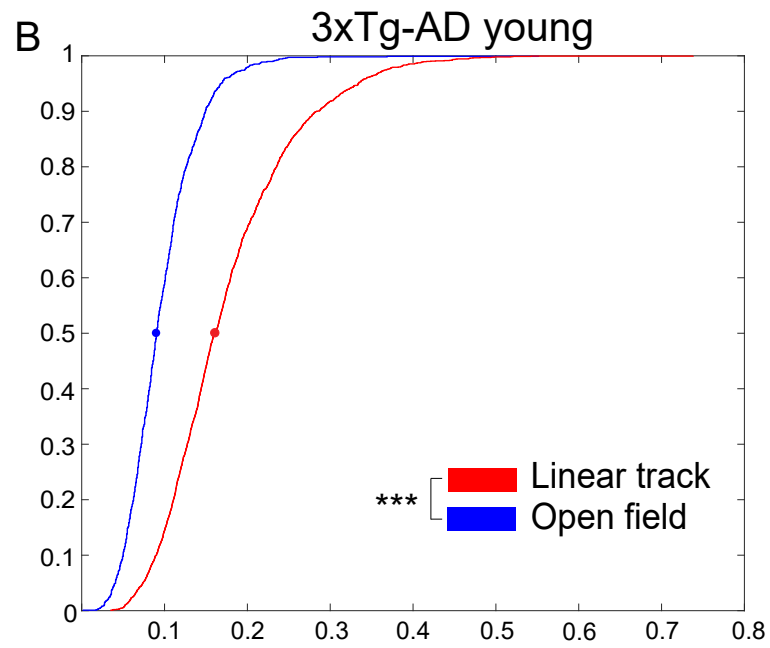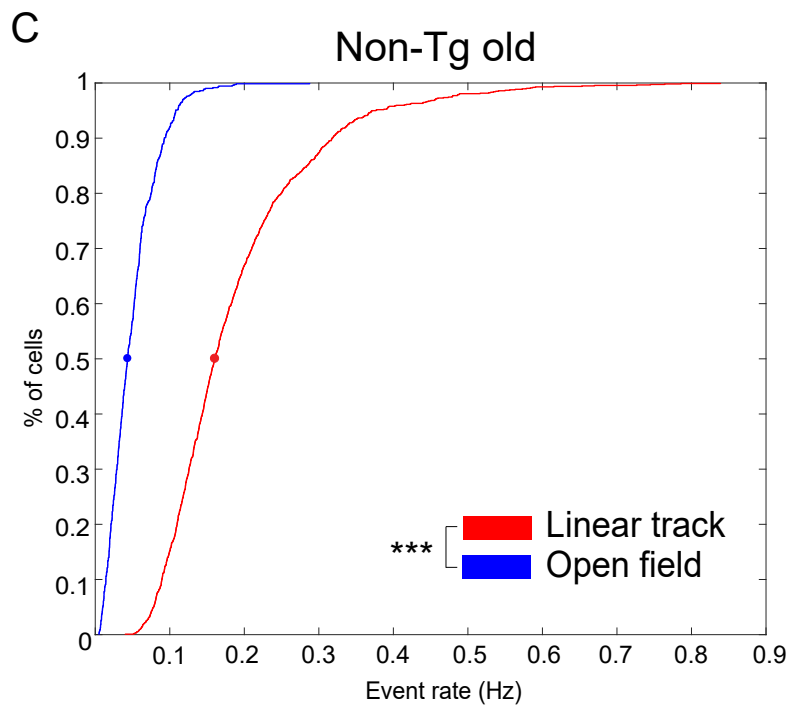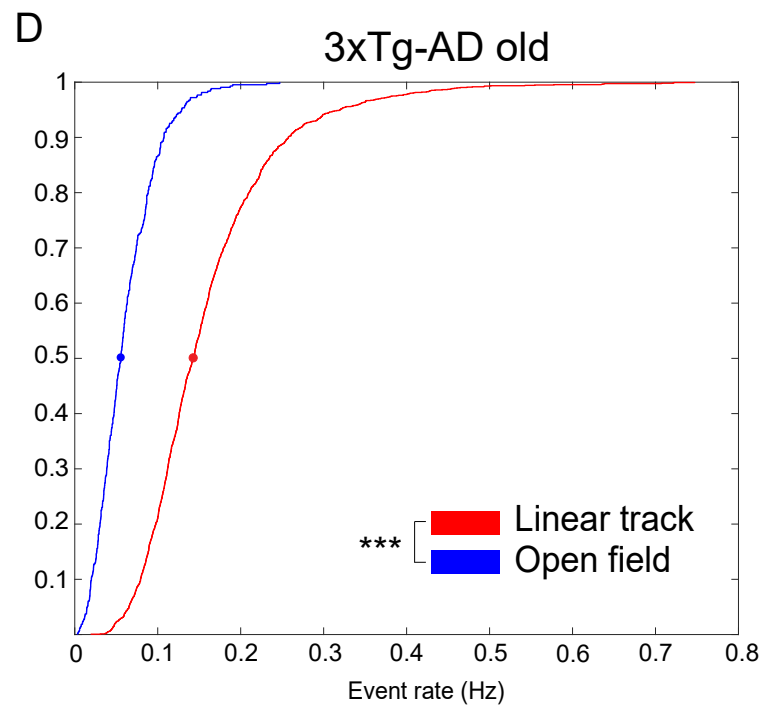

Fig. S3

Supplement: NIHMS1834491-supplement-Lin_et_al__Supplement.pdf [file NIHMS1834491-supplement-Lin_et_al__Supplement.pdf]
